# Supplementary material
Source: publisher site journal article supplement (https://www.dovepress.com/get_supplementary_file.php?f=244826.docx)
Supplement: Supplementary file 1 [file get_supplementary_file.php]

**Supplemental Table S1: A complete list of hospitals**

| **No.** | **Province** | **City** | **Hospital** |
| --- | --- | --- | --- |
| 1 | Anhui | Anqing | Anqing first people’s hospital |
| 2 | Anhui | Anqing | Anqing hospital |
| 3 | Anhui | Bengbu | Huaiyuan second people’s hospital |
| 4 | Anhui | Fuyang | Jieshou people’s hospital |
| 5 | Anhui | Hefei | Anhui medical university fourth hospital |
| 6 | Anhui | Hefei | Hefei third hospital |
| 7 | Anhui | Huainan | Huainan dongfang hospital |
| 8 | Anhui | Liuan | Shucheng people’s hospital |
| 9 | Beijing | Beijing | Peking university international hospital |
| 10 | Beijing | Beijing | Meitan general hospital |
| 11 | Beijing | Beijing | Beijing haidian hospital |
| 12 | Beijing | Beijing | Navi general hospital |
| 13 | Beijing | Beijing | Beijing mentougou hospital |
| 14 | Beijing | Beijing | Guanganmen hospital (south district) |
| 15 | Fujian | Putian | Putian first hospital |
| 16 | Fujian | Quanzhou | Fujian medical university second hospital |
| 17 | Fujian | Quanzhou | Quanzhou first hospital |
| 18 | Fujian | Zhangzhou | Zhangzhou hospital |
| 19 | Gansu | Jiayuguan | Jiayuguan red-cross great wall hospital |
| 20 | Gansu | Linxia | Linxia hezheng hospital |
| 21 | Gansu | Linxia | Linxia hospital |
| 22 | Gansu | Longnan | Longnan people’s hospital |
| 23 | Gansu | Qingyang | Qingyang people’s hospital |
| 24 | Gansu | Wuwei | Wuwei first people’s hospital |
| 25 | Gansu | Zhangye | Ganzhou people’s hospital |
| 26 | Gansu | Zhangye | Shandan people’s hospital |
| 27 | Guangdong | Dongguan | Dongguan kanghua hospital |
| 28 | Guangdong | Dongguan | Dongguan dalang hospital |
| 29 | Guangdong | Guangzhou | Guangdong second people’s hospital |
| 30 | Guangdong | Guangzhou | Guangdong people’s hospital |
| 31 | Guangdong | Guangzhou | Guangdong traditional medical hospital ershadao hospital |
| 32 | Guangdong | Guangzhou | Guangdong traditional medical hospital fangcun hospital |
| 33 | Guangdong | Guangzhou | Guangzhou first people’s hospital |
| 34 | Guangdong | Guangzhou | Guangdong traditional medical university first hospital |
| 35 | Guangdong | Guangzhou | Nanfang medical university nanfang hospital |
| 36 | Guangdong | Guangzhou | Nanfang medical university zhujiang hospital |
| 37 | Guangdong | Guangzhou | Zhongshan university third hospital |
| 38 | Guangdong | Heyuan | Heyuan people’s hospital |
| 39 | Guangdong | Shaoguan | Wengyuan people’s hospital |
| 40 | Guangdong | Zhanjiang | Zhanjiang center people’s hospital |
| 41 | Guangxi | Baise | Youjiang nationality medical university affiliated hospital |
| 42 | Guangxi | Guilin | Guilin second people’s hospital |
| 43 | Guangxi | Guilin | Guilin people’s hospital |
| 44 | Guangxi | Liuzhou | Liuzhou people’s hospital |
| 45 | Guangxi | Liuzhou | Liuzhou center hospital |
| 46 | Guangxi | Nanning | Guangxi people’s hospital |
| 47 | Guangxi | Nanning | Guangxi medical university first hospital |
| 48 | Guangxi | Nanning | Guangxi traditional medical university first hospital |
| 49 | Guangxi | Nanning | Guangxi Zhuang nationality hospital |
| 50 | Guangxi | Nanning | Hengxian people’s hospital |
| 51 | Guangxi | Yulin | Beiliu people’s hospital |
| 52 | Guizhou | Bijie | Bijie first people’s hospital |
| 53 | Guizhou | Guiyang | Guiyang medical university affiliated baiyun hospital |
| 54 | Guizhou | Guiyang | Guizhou medical university second hospital |
| 55 | Guizhou | Qiannan | Guizhou medical university third hospital |
| 56 | Guizhou | Tongren | Tongren people’s hospital |
| 57 | Guizhou | Zunyi | Zunyi first people’s hospital |
| 58 | Hainan | Haikou | Haikou people’s hospital |
| 59 | Hebei | Baoding | Baoding first hospital |
| 60 | Hebei | Cangzhou | Cangzhou center hospital |
| 61 | Hebei | Chengde | Chengde traditional medical hospital |
| 62 | Hebei | Shijiazhuang | Baiqiuen international heping hospital |
| 63 | Hebei | Shijiazhuang | Hebei people’s hospital |
| 64 | Hebei | Shijiazhuang | Hebei medical university fourth hospital |
| 65 | Hebei | Shijiazhuang | Shijiazhuang first hospital |
| 66 | Hebei | Shijiazhuang | Shijiazhuang traditional medical hospital |
| 67 | Hebei | Tangshan | Qianan traditional medical hospital |
| 68 | Hebei | Tangshan | Tangshan worker’s hospital |
| 69 | Hebei | Xingtai | Xingtai fifth hospital |
| 70 | Hebei | Xingtai | Xingtai people’s hospital |
| 71 | Henan | Anyang | Anyang hospital |
| 72 | Henan | Hebi | Hebi first people’s hospital |
| 73 | Henan | Luoyang | Henan technology university first affiliated hospital |
| 74 | Henan | Luoyang | Luoyang dongfang hospital |
| 75 | Henan | Luoyang | Luoyang sixth people’s hospital |
| 76 | Henan | Luoyang | Luoyang first people’s hospital |
| 77 | Henan | Luoyang | Ruyang people’s hospital |
| 78 | Henan | Luoyang | Yanshi people’s hospital |
| 79 | Henan | Puyang | Puyang third people’s hospital |
| 80 | Henan | Puyang | Puyang traditional medical hospital |
| 81 | Henan | Sanmenxia | Sanmenxia huanghe hospital |
| 82 | Henan | Shangqiu | Shangqiu first people’s hospital |
| 83 | Henan | Shangqiu | Xiayi people’s hospital |
| 84 | Henan | Xinxiang | Henan hongli hospital |
| 85 | Henan | Xinxiang | Xinxiang center hospital |
| 86 | Henan | Xinyang | Shangcheng people’s hospital |
| 87 | Henan | Xuchang | Xuchang center hospital |
| 88 | Henan | Zhengzhou | Zhengzhou university second affiliated hospital |
| 89 | Henan | Zhengzhou | Zhengzhou people’s hospital (Zhengzhou fifth people’s hospital) |
| 90 | Henan | Zhengzhou | Zhengzhou center hospital (Zhengzhou fourth people’s hospital) |
| 91 | Henan | Zhengzhou | Chinese general army 153 hospital |
| 92 | Henan | Zhoukou | Xihua people’s hospital |
| 93 | Henan | Zhoukou | Zhoukou chengyue diabetes hospital |
| 94 | Henan | Zhumadian | Zhumadian first people’s hospital |
| 95 | Henan | Zhumadian | Zhumadian certer hospital |
| 96 | Heilongjiang | Daqing | Daqing longnan hospital |
| 97 | Heilongjiang | Daqing | Daqing youtian general hospital |
| 98 | Heilongjiang | Haerbin | Heilongjiang nongken general hospital |
| 99 | Heilongjiang | Haerbin | Heilongjiang traditional medical hospital |
| 100 | Heilongjiang | Jiamusi | Jiamusi insurance hospital |
| 101 | Heilongjiang | Mudanjiang | Mudanjiang hongqi hospital |
| 102 | Heilongjiang | Qiqihaer | Qiqihaer traditional medical hospital first hospital |
| 103 | Hubei | Ezhou | Ezhou center hospital |
| 104 | Hubei | Enshi | Enshi center hospital |
| 105 | Hubei | Enshi | Hefeng center hospital |
| 106 | Hubei | Enshi | Hubei nationality university affiliated hospital |
| 107 | Hubei | Enshi | Laifeng people’s hospital |
| 108 | Hubei | Enshi | Lichuan traditional medical hospital |
| 109 | Hubei | Huanggang | Luotian people’s hospital |
| 110 | Hubei | Huanggang | Jinchun people’s hospital |
| 111 | Hubei | Huangshi | Huangshi center hospital |
| 112 | Hubei | Wuhan | Hubei people’s hospital |
| 113 | Hubei | Wuhan | Wuhan fourth hospital |
| 114 | Hubei | Wuhan | China construction third engineering bureau Wuhan center hospital |
| 115 | Hubei | Yichang | Dangyang people’s hospital |
| 116 | Hubei | Yichang | Yichang yiling hospital |
| 117 | Hunan | Binzhou | Binzhou first people’s hospital |
| 118 | Hunan | Hengyang | Hengyang center hospital |
| 119 | Hunan | Hengyang | Nanhua university nanhua hospital |
| 120 | Hunan | Huaihua | Huaihua first people’s hospital |
| 121 | Hunan | Huaihua | Huaihua traditional medical hospital |
| 122 | Hunan | Huaihua | Ruanling people’s hospital |
| 123 | Hunan | Shaoyang | Shaoyang second people’s hospital |
| 124 | Hunan | Xiangtan | Xiangtan first people’s hospital |
| 125 | Hunan | Yiyang | Anhua people’s hospital |
| 126 | Hunan | Yiyang | Taojiang people’s hospital |
| 127 | Hunan | Yiyang | Yiyang people’s hospital |
| 128 | Hunan | Yiyang | Yiyang center hospital |
| 129 | Hunan | Yongzhou | Qiyang people’s hospital |
| 130 | Hunan | Yongzhou | Xitian people’s hospital |
| 131 | Hunan | Yongzhou | Xitian traditional medical hospital |
| 132 | Hunan | Yongzhou | Yongzhou center hospital (north) |
| 133 | Hunan | Yongzhou | Yongzhou center hospital (south) |
| 134 | Hunan | Yueyang | Xiangyin people’s hospital |
| 135 | Hunan | Yueyang | Yueyang second people’s hospital |
| 136 | Hunan | Changsha | Hunnan hangtian hospital |
| 137 | Hunan | Changsha | Hunan traditional medical university first hospital |
| 138 | Hunan | Changsha | Liuyang traditional medical hospital |
| 139 | Hunan | Changsha | Changsha fourth hospital |
| 140 | Hunan | Changsha | Changsha first hospital |
| 141 | Hunan | Changsha | Changsha city first hospital |
| 142 | Hunan | Changsha | Changsha center hospital |
| 143 | Hunan | Changsha | Zhongnan university xiangya second hospital |
| 144 | Hunan | Zhuzhou | Hunan traditional medical hospital |
| 145 | Hunan | Zhuzhou | Hunan normal university affiliated xiangdong hospital |
| 146 | Hunan | Zhuzhou | Zhuzhou center hospital |
| 147 | Jilin | Jilin | Beihua university affiliated hospital |
| 148 | Jilin | Jilin | Jihua general hospital |
| 149 | Jilin | Songyuan | Jilin oil general hospital |
| 150 | Jilin | Changchun | Changchun center hospital |
| 151 | Jiangsu | Huaian | Hongze people’s hospital |
| 152 | Jiangsu | Huaian | Huaian second people’s hospital |
| 153 | Jiangsu | Suzhou | Suzhou technology hospital |
| 154 | Jiangsu | Suzhou | Taicang first people’s hospital |
| 155 | Jiangsu | 宿迁 | Suqian people’s hospital |
| 156 | Jiangsu | Xuzhou | Xuzhou medical university affiliated hospital |
| 157 | Jiangxi | Ganzhou | Ganzhou people’s hospital |
| 158 | Jiangxi | Jingdezhen | Jingdezhen third people’s hospital |
| 159 | Jiangxi | Jiujiang | Jiujiang first people’s hospital |
| 160 | Jiangxi | Jiujiang | Jiujiang affiliated hospital |
| 161 | Jiangxi | Nanchang | Jiangxi people’s hospital |
| 162 | Jiangxi | Nanchang | Nanchang university fourth hospital |
| 163 | Jiangxi | Pingxiang | Xiangya pingkuang collaboration hospital |
| 164 | Jiangxi | Yichun | Shanggao traditional medical hospital |
| 165 | Jiangxi | Yingtan | Yingtan people’s hospital |
| 166 | Liaoning | Anshan | Anshan shuangshan hospital |
| 167 | Liaoning | Anshan | Anshan tiexi hospital |
| 168 | Liaoning | Anshan | Anshan center hospital |
| 169 | Liaoning | Benxi | Benxi iron and steel group general hospital |
| 170 | Liaoning | Benxi | Benxi railway hospital |
| 171 | Liaoning | Benxi | Benxi center hospital |
| 172 | Liaoning | Chaoyang | Chaoyang second people’s hospital |
| 173 | Liaoning | Chaoyang | Chaoyang center hospital |
| 174 | Liaoning | Dandong | Dandong first hospital |
| 175 | Liaoning | Dandong | Donggang center hospital |
| 176 | Liaoning | Dandong | Donggang traditional medical hospital |
| 177 | Liaoning | Fushun | Fushun center hospital |
| 178 | Liaoning | Huludao | Huludao center hospital |
| 179 | Liaoning | Jinzhou | Jinzhou center hospital |
| 180 | Liaoning | Jinzhou | Liaoning medical university first hospital |
| 181 | Liaoning | Liaoyang | Dengta traditional medical hospital |
| 182 | Liaoning | Panjin | Panjin center hospital |
| 183 | Liaoning | Shenyang | Liaoning people’s hospital |
| 184 | Liaoning | Shenyang | Liaoning traditional medical university affiliated hospital |
| 185 | Liaoning | Shenyang | Shenyang seventh people’s hospital |
| 186 | Liaoning | Shenyang | Shenyang fourth people’s hospital |
| 187 | Liaoning | Shenyang | Shenyang fifth people’s hospital |
| 188 | Liaoning | Shenyang | Shenyang sujiatun center hospital |
| 189 | Liaoning | Shenyang | Shenyang medical university affiliated center hospital |
| 190 | Liaoning | Shenyang | Chinese medical university second hospital (Shengjing hospital) |
| 191 | Liaoning | Tieling | Tieling center hospital |
| 192 | Neimenggu | Bayanzhuoer | Linhe people’s hospital |
| 193 | Neimenggu | Baotou | Baotou fourth hospital |
| 194 | Neimenggu | Baotou | Baotou center hospital |
| 195 | Neimenggu | Chifeng | Chifeng affiliated second hospital |
| 196 | Neimenggu | Chifeng | Chifeng songshan hospital |
| 197 | Neimenggu | Huhehaote | Huhehaote first hospital |
| 198 | Neimenggu | Huhehaote | Neimenggu international Meng hospital |
| 199 | Neimenggu | Huhehaote | Neimenggu people’s hospital |
| 200 | Neimenggu | Hulunbeier | Zhalantun Meng hospital |
| 201 | Neimenggu | Tongliao | Tongliao hospital |
| 202 | Neimenggu | Wuhai | Wuhai haibowan distric hospital |
| 203 | Neimenggu | Wuhai | Wuhai people’s hospital |
| 204 | Neimenggu | Xinganmeng | Xinganmeng people’s hospital |
| 205 | Ningxia | Wuzhong | Qingtongxia people’s hospital |
| 206 | Ningxia | Wuzhong | Wuzhong people’s hospital |
| 207 | Ningxia | Wuzhong | Yanchi people’s hospital |
| 208 | Ningxia | Yinchuan | Ningxia Hui people’s hospital |
| 209 | Ningxia | Yinchuan | Ningxia medical university general hospital |
| 210 | Ningxia | Yinchuan | Yinchuan second people’s hospital |
| 211 | Ningxia | Yinchuan | Yinchuan first people’s hospital |
| 212 | Ningxia | Zhongwei | Zhongwei people’s hospital |
| 213 | Qinghai | Xining | Datong people’s hospital |
| 214 | Qinghai | Xining | Qinghai redcross hospital |
| 215 | Qinghai | Xining | Qinghai jiaotong hospital |
| 216 | Qinghai | Xining | Qinghai traditional medical hospital |
| 217 | Qinghai | Xining | Xining first people’s hospital |
| 218 | Shandong | Binzhou | Zouping people’s hospital |
| 219 | Shandong | Dezhou | Linyi people’s hospital |
| 220 | Shandong | Jining | Yankuang group limited company general hospital |
| 221 | Shandong | Linyi | Linyi traditional medical hospital |
| 222 | Shandong | Qingdao | Pingdu people’s hospital |
| 223 | Shandong | Qingdao | Qingdao 401 hospital |
| 224 | Shandong | Qingdao | Rizhao traditional medical hospital |
| 225 | Shandong | Weihai | Weihai hospital |
| 226 | Shandong | Weifang | Gaomi people’s hospital |
| 227 | Shandong | Weifang | Qingzhou yidu center hospital |
| 228 | Shandong | Weifang | Shouguang people’s hospital |
| 229 | Shandong | Weifang | Weifang people’s hospital |
| 230 | Shandong | Yantai | Laiyang center hospital |
| 231 | Shanxi | Datong | Datong third people’s hospital |
| 232 | Shanxi | Jincheng | Jincheng people’s hospital |
| 233 | Shanxi | Jinzhong | Jinzhong first people’s hospital |
| 234 | Shanxi | Lvliang | Shanxi fenyang hospital |
| 235 | Shanxi | Lvliang | Wenshui people’s hospital |
| 236 | Shanxi | Lvliang | Xiaoyi people’s hospital |
| 237 | Shanxi | Taiyuan | Shanxi province hospital |
| 238 | Shanxi | Taiyuan | Shanxi people’s hospital |
| 239 | Shanxi | Taiyuan | Shanxi Chinese western collaborated hospital |
| 240 | Shanxi | Taiyuan | Taiyuan center hospital |
| 241 | Shanxi | Yuncheng | Yuncheng tongde hospital |
| 242 | Shanxi | Changzhi | Changzhi medical university affiliated heping hospital |
| 243 | Shannxi | Ankang | Ankang center hospital |
| 244 | Shannxi | Baoji | Baoji center hospital |
| 245 | Shannxi | Hanzhong | Hanzhong 3201 hospital |
| 246 | Shannxi | Hanzhong | Hanzhong center hospital |
| 247 | Shannxi | Hanzhong | Nanzheng people’s hospital |
| 248 | Shannxi | Weinan | Weinan center hospital |
| 249 | Shannxi | Xian | Shannxi traditional medical hospital |
| 250 | Shannxi | Xianyang | Shannxi province 215 hospital |
| 251 | Shannxi | Xianyang | Yanan university xianyang hospital |
| 252 | Shannxi | Yulin | Yulin north hospital |
| 253 | Shanghai | Shanghai | Shanghai seventh people’s hospital |
| 254 | Shanghai | Shanghai | Shanghai pudong district punan hospital |
| 255 | Shanghai | Shanghai | Shanghai dong hospital |
| 256 | Sichuan | Chengdu | Sichuan university huaxi hospital xizang chengdu bureau hospital |
| 257 | Sichuan | Guangyuan | Guangyuan first people’s hospital |
| 258 | Sichuan | Guangyuan | Guangyuan center hospital |
| 259 | Sichuan | Meishan | Meishan people’s hospital |
| 260 | Tianjin | Tianjin | Tianjin fourth center hospital |
| 261 | Tianjin | Tianjin | Tianjin traditional medical university second affiliated hospital |
| 262 | Tianjin | Tianjin | Tianjin nankai district traditional medical hospital |
| 263 | Tianjin | Tianjin | Tianjin santan hospital |
| 264 | Tianjin | Tianjin | Tianjin ocean oil general hospital |
| 265 | Xinjiang | Akesu | Xinjiangproduction and construction regiment first hospital |
| 266 | Xinjiang | Bayinguoleng | Kuerle people’s hospital |
| 267 | Xinjiang | Kelamayi | Dushanzi people’s hospital |
| 268 | Xinjiang | Kelamayi | Kelamayi people’s hospital |
| 269 | Xinjiang | kezilesukeerkeerzi | Kezilesukeerkeerzi people’s hospital |
| 270 | Xinjiang | Wulumuqi | 474 hospital |
| 271 | Xinjiang | Wulumuqi | Lanzhou Wulumuqi hospital |
| 272 | Xinjiang | Wulumuqi | Xinjiang Weiwuer people’s hospital |
| 273 | Xinjiang | Wulumuqi | Xinjiang Weiwuer traditional medical hospital |
| 274 | Xinjiang | Wulumuqi | Xinjiang medical university fifth affiliated hospital |
| 275 | Xinjiang | Wulumuqi | Xinjiang medical university first affiliated hospital |
| 276 | Xinjiang | Yili | Yili state friendship hospital |
| 277 | Yunnan | Dehong | Dehong Dai Jingbo state people’s hospital |
| 278 | Yunnan | Honghe | Gejiu people’s hospital |
| 279 | Yunnan | Honghe | Luxi people’s hospital |
| 280 | Yunnan | Kunming | Chengdu Army Kunming general hospital |
| 281 | Yunnan | Kunming | Kunming first people’s hospital ganmei international hospital |
| 282 | Yunnan | Kunming | Kunming medical university second affiliated hospital |
| 283 | Yunnan | Kunming | Kunming medical university first affiliated hospital |
| 284 | Yunnan | Kunming | Yunnan first people’s hospital |
| 285 | Yunnan | Kunming | Yunnan traditional medical hospital |
| 286 | Yunnan | Qujing | Xuanwei people’s hospital |
| 287 | Zhejiang | Hangzhou | Hangzhou redcross hospital |
| 288 | Zhejiang | Jinhua | Dongyang people’s hospital |
| 289 | Zhejiang | Jinhua | Yiwu center hospital |
| 290 | Zhejiang | Ningbo | Cixi people’s hospital |
| 291 | Zhejiang | Ningbo | Ninghai first people’s hospital |
| 292 | Zhejiang | Quzhou | Jiangshan people’s hospital |
| 293 | Chongqing | Chongqing | Chongqing fuling district center hospital |
| 294 | Chongqing | Chongqing | Wanzhou people’s hospital |
| 295 | Chongqing | Chongqing | Chongqing sanxia center hospital |
| 296 | Chongqing | Chongqing | Chongqing fourth people’s hospital |
| 297 | Chongqing | Chongqing | Chongqing university affiliated first hospital |
